# Supplementary material for: Synucleinopathy alters nanoscale organization and diffusion in the brain extracellular space through hyaluronan remodeling
Source: PubMed Central journal article supplement (PMC7351768; doi:10.1038/s41467-020-17328-9), 2020-07-10
Supplement: 41467_2020_17328_MOESM8_ESM.pdf [file 41467_2020_17328_MOESM8_ESM.pdf]

## Reporting Summary

Nature Research wishes to improve the reproducibility of the work that we publish. This form provides structure for consistency and transparency in reporting. For further information on Nature Research policies, see [Authors & Referees](#) and the [Editorial Policy Checklist](#).

### Statistics

For all statistical analyses, confirm that the following items are present in the figure legend, table legend, main text, or Methods section.

n/a Confirmed

- |                                     |                                     |                                                                                                                                                                                                                                                            |
|-------------------------------------|-------------------------------------|------------------------------------------------------------------------------------------------------------------------------------------------------------------------------------------------------------------------------------------------------------|
| <input type="checkbox"/>            | <input checked="" type="checkbox"/> | The exact sample size ( $n$ ) for each experimental group/condition, given as a discrete number and unit of measurement                                                                                                                                    |
| <input type="checkbox"/>            | <input checked="" type="checkbox"/> | A statement on whether measurements were taken from distinct samples or whether the same sample was measured repeatedly                                                                                                                                    |
| <input type="checkbox"/>            | <input checked="" type="checkbox"/> | The statistical test(s) used AND whether they are one- or two-sided<br><i>Only common tests should be described solely by name; describe more complex techniques in the Methods section.</i>                                                               |
| <input type="checkbox"/>            | <input checked="" type="checkbox"/> | A description of all covariates tested                                                                                                                                                                                                                     |
| <input type="checkbox"/>            | <input checked="" type="checkbox"/> | A description of any assumptions or corrections, such as tests of normality and adjustment for multiple comparisons                                                                                                                                        |
| <input type="checkbox"/>            | <input checked="" type="checkbox"/> | A full description of the statistical parameters including central tendency (e.g. means) or other basic estimates (e.g. regression coefficient) AND variation (e.g. standard deviation) or associated estimates of uncertainty (e.g. confidence intervals) |
| <input type="checkbox"/>            | <input checked="" type="checkbox"/> | For null hypothesis testing, the test statistic (e.g. $F$ , $t$ , $r$ ) with confidence intervals, effect sizes, degrees of freedom and $P$ value noted<br><i>Give <math>P</math> values as exact values whenever suitable.</i>                            |
| <input checked="" type="checkbox"/> | <input type="checkbox"/>            | For Bayesian analysis, information on the choice of priors and Markov chain Monte Carlo settings                                                                                                                                                           |
| <input checked="" type="checkbox"/> | <input type="checkbox"/>            | For hierarchical and complex designs, identification of the appropriate level for tests and full reporting of outcomes                                                                                                                                     |
| <input checked="" type="checkbox"/> | <input type="checkbox"/>            | Estimates of effect sizes (e.g. Cohen's $d$ , Pearson's $r$ ), indicating how they were calculated                                                                                                                                                         |

*Our web collection on [statistics for biologists](#) contains articles on many of the points above.*

### Software and code

Policy information about [availability of computer code](#)

Data collection

NIR images were acquired with LightField (Teledyne) Confocal images were acquired with LAS X (Leica). EM ultramicrographs were acquired with DigitalMicrograph (Gatan). Immunohistochemistry images were acquired with NIS Elements (Nikon). TH cell counts were done in Mercator (ExploraNova).

Data analysis

EM and immunohistochemical data was analyzed in Fiji/ImageJ (NIH). NIR images were analyzed with MetaMorph (Molecular Devices) for initial coordinates detection and MATLAB for all subsequent superresolution analysis. Excel 2013 (Microsoft) was used to sort and normalize fluorescence data. qPCR data was analyzed with Gene Expression Analysis Software Environment (INSERM). ThT and ELISA were analyzed with Mars v3.01 R2 (BMG Labtech). MATLAB was used for correlation analysis and KS test of local thickness data. GraphPad 7.0 (Prism) was used for all other statistical analysis.

For manuscripts utilizing custom algorithms or software that are central to the research but not yet described in published literature, software must be made available to editors/reviewers. We strongly encourage code deposition in a community repository (e.g. GitHub). See the Nature Research [guidelines for submitting code & software](#) for further information.

### Data

Policy information about [availability of data](#)

All manuscripts must include a [data availability statement](#). This statement should provide the following information, where applicable:

- Accession codes, unique identifiers, or web links for publicly available datasets
- A list of figures that have associated raw data
- A description of any restrictions on data availability

The data that support the findings of this study are available from the corresponding authors upon request.

## Field-specific reporting

Please select the one below that is the best fit for your research. If you are not sure, read the appropriate sections before making your selection.

- Life sciences       Behavioural & social sciences       Ecological, evolutionary & environmental sciences

For a reference copy of the document with all sections, see [nature.com/documents/nr-reporting-summary-flat.pdf](https://www.nature.com/documents/nr-reporting-summary-flat.pdf)

## Life sciences study design

All studies must disclose on these points even when the disclosure is negative.

|                 |                                                                                                                                                                                                                                                                                                                                                                                                                                                                                                                                                                                                                                                                               |
|-----------------|-------------------------------------------------------------------------------------------------------------------------------------------------------------------------------------------------------------------------------------------------------------------------------------------------------------------------------------------------------------------------------------------------------------------------------------------------------------------------------------------------------------------------------------------------------------------------------------------------------------------------------------------------------------------------------|
| Sample size     | No statistical method was used to decide sample sizes. Since we use previously reported methodologies routinely used in our laboratories, we determined sample size from our own experience (refs 2, 18, 19) and other publications in the field. In the case of cryofixation-EM experiments, 4MU and Hyase experiments, we determined sample size on the base of pilot studies performed on naïve mice of similar age, gender and strain.                                                                                                                                                                                                                                    |
| Data exclusions | We discarded SWCNT trajectories that rendered a plateau-shaped global MSD as we considered these nanotubes as immobile. We discarded EM images with clear freezing artifacts that rendered membranes (and therefore ECS) indiscernible. In qPCR analysis, we discarded genes with high CT (>35) and reported as "not detected". In IF analysis, we discarded sections that were less than 100 microns from the point of injection, to exclude inflammation due to mechanical damage. No other data points were excluded from the analysis.                                                                                                                                    |
| Replication     | Methodologies that are routinely used in our laboratories were successfully reproduced according to our previous publications (LB-induced neurodegeneration, local width and diffusivity values from single-nanotube tracking, IF stainings and quantifications). For newly acquired methodologies (cryofixation-EM, 4MU treatment, Hyase and ChABC injection), we conducted pilot experiments where we validated those methods, which were successfully replicated in the study. The key finding of increased ECS width and diffusion in LB-inoculated mice was replicated in two completely different experiments performed independently that achieved the same conclusion |
| Randomization   | Mice were selected randomly for all experiments.                                                                                                                                                                                                                                                                                                                                                                                                                                                                                                                                                                                                                              |
| Blinding        | In single-nanotube tracking, cryofixation-EM analysis and stereological cell counts, the experimenter was blind to the experimental group. For all other experiments, analysis was not blinded. Nevertheless, all image analysis protocols (except for phagocytosis quantification) were semi-automated routines developed prior to data acquisition.                                                                                                                                                                                                                                                                                                                         |

## Reporting for specific materials, systems and methods

We require information from authors about some types of materials, experimental systems and methods used in many studies. Here, indicate whether each material, system or method listed is relevant to your study. If you are not sure if a list item applies to your research, read the appropriate section before selecting a response.

### Materials & experimental systems

| n/a                                 | Included in the study                                           |
|-------------------------------------|-----------------------------------------------------------------|
| <input type="checkbox"/>            | <input checked="" type="checkbox"/> Antibodies                  |
| <input checked="" type="checkbox"/> | <input type="checkbox"/> Eukaryotic cell lines                  |
| <input checked="" type="checkbox"/> | <input type="checkbox"/> Palaeontology                          |
| <input type="checkbox"/>            | <input checked="" type="checkbox"/> Animals and other organisms |
| <input checked="" type="checkbox"/> | <input type="checkbox"/> Human research participants            |
| <input checked="" type="checkbox"/> | <input type="checkbox"/> Clinical data                          |

### Methods

| n/a                                 | Included in the study                           |
|-------------------------------------|-------------------------------------------------|
| <input checked="" type="checkbox"/> | <input type="checkbox"/> ChIP-seq               |
| <input checked="" type="checkbox"/> | <input type="checkbox"/> Flow cytometry         |
| <input checked="" type="checkbox"/> | <input type="checkbox"/> MRI-based neuroimaging |

## Antibodies

### Antibodies used

Hyaluronic Acid Binding Protein biotinylated (5 µg/ml, Merck Millipore, catalog number 385911); Wisteria Floribunda Agglutinin biotinylated (1:200, Vector Labs, catalog number B-1355); Iba1 (1:500, Wako, catalog number 019-19741); CD68 clone FA11 (1:100, Bio-Rad, catalog number MCA1957); TH clone LCN1 (1:2000 IF, 1:5000 IHC, Merck-Millipore, catalog number MAB318); human alpha-synuclein clone Syn211 (1:1000, ThermoFisher, catalog number MA5-12272); alpha-synuclein clone 42 (1:5000, BD Biosciences, catalog number 610787); Streptavidin-Atto647N (1:500, Sigma-Aldrich, catalog number 94149); goat anti-mouse IgG Alexa488 (1:500, ThermoFisher, catalog number A-11001); goat anti-mouse IgG Alexa594 (1:500, ThermoFisher, catalog number A-11032); goat anti-rabbit IgG Alexa488 (1:500, ThermoFisher, catalog number A-11008); goat anti-rat IgG Alexa594 (1:500, ThermoFisher, catalog number A-11007).

### Validation

All antibodies are commercially available, and validated for the applications used in this study. Validation information is available on the manufacturer's publicly accessible datasheets.

## Animals and other organisms

---

Policy information about [studies involving animals](#); [ARRIVE guidelines](#) recommended for reporting animal research

### Laboratory animals

Male C57BL6/J adult (+P70) mice purchased from Charles River (France) were used for all experiments. For 4MU treatments, we started diet in P50 animals, in order to achieve effective hyaluronan depletion by P70, when LB were inoculated. No transgenic mice were used in this study.

### Wild animals

No wild animals were used in this study.

### Field-collected samples

No field-collected samples were used in this study.

### Ethics oversight

The Institutional Animal Care and Use Committee of Bordeaux (CE50) and the Ministère de l'Enseignement supérieur, de la Recherche et de l'Innovation (France) approved experiments under licenses #5520-2016052514328805 (LB and Hyase experiments) and #10721-2017071213284522 (4MU experiments).

Note that full information on the approval of the study protocol must also be provided in the manuscript.
